# Supplementary material for: Emerging investigators series: the efficacy of chlorine photolysis as an advanced oxidation process for drinking water treatment
Source: Royal Society of Chemistry journal article supplement (doi:10.1039/c6ew00029k), 2016-01-01
Supplement: c6ew00029k1.pdf [file c6ew00029k1.pdf]

# The Efficacy of Chlorine Photolysis as an Advanced Oxidation Process for Drinking Water Treatment: Supplemental Information

*Christina K. Remucal<sup>a,b\*</sup> and Devon Manley<sup>b</sup>*

<sup>a</sup>Department of Civil and Environmental Engineering

University of Wisconsin – Madison

Madison, Wisconsin

<sup>b</sup>Environmental Chemistry and Technology Program

University of Wisconsin – Madison

Madison, Wisconsin

Submitted to: *Environmental Science: Water Research & Technology*, Jan. 28, 2016.

**Contents (9 pages):  
Tables S1-S4**

\* Corresponding author e-mail: [remucal@wisc.edu](mailto:remucal@wisc.edu); telephone: 608-262-1820; fax: 608-262-0454.

Tables S1-S4 summarize the experimental conditions for studies that quantified the formation of disinfection by-products (DBPs) by chlorine in the presence and absence of light. The type and fluence of the light source, the experimental duration (i.e., time between chlorine addition and DBP measurement), the free available chlorine (FAC) concentration, pH, and dissolved organic carbon (DOC) concentration are indicated for each data point. The difference between the concentration of DBP measured in the irradiated solutions and in dark control experiments is presented graphically in Figure 3 in the manuscript. Note that full-scale studies that pre-chlorinated water before any treatment are not included due to the elevated background DBP concentrations detected using that approach.

**Table S1:** Summary of experimental conditions for studies quantifying the formation of trihalomethanes (THMs) produced by chlorine in the presence and absence of light. The studies quantified either chloroform alone (denoted  $\text{CHCl}_3$ ) or total trihalomethanes (denoted TTHM; the sum of bromodichloromethane, bromoform, chloroform, and dibromochloromethane).

| DBPs Quantified   | Light Source | Fluence (mJ/cm <sup>2</sup> ) | Duration (min) | pH  | [FAC] (mg/L as Cl <sub>2</sub> ) | [DOC] (mg/L) | [DBP] in Irradiated Experiment (µg/L) | [DBP] in Dark Experiment (µg/L) | Reference |
|-------------------|--------------|-------------------------------|----------------|-----|----------------------------------|--------------|---------------------------------------|---------------------------------|-----------|
| CHCl <sub>3</sub> | Hg           | N/A                           | 60             | 8.1 | 2                                | 4            | 4.2                                   | 9.5                             | 1         |
|                   |              |                               |                | 6.5 |                                  |              | 2.9                                   | 3.1                             |           |
|                   | LP UV        | 60                            | 4,320          | 7   | 7                                | 5            | 122                                   | 87                              | 2         |
|                   |              |                               |                | 7   |                                  | 5            | 78                                    | 55                              |           |
|                   |              |                               |                | 6.8 |                                  | 1.8          | 35                                    | 24                              |           |
|                   |              |                               |                | 7   |                                  | 5            | 80                                    | 47                              |           |
|                   | MP UV        |                               |                | 7   |                                  | 5            | 92                                    | 87                              |           |
|                   |              |                               |                | 7   |                                  | 5            | 77                                    | 55                              |           |
|                   |              |                               |                | 6.8 |                                  | 1.8          | 40                                    | 24                              |           |
|                   |              |                               |                | 7   |                                  | 5            | 86                                    | 47                              |           |
| TTHM              | LP UV        | 3,900                         | 120            | 7.5 | 10                               | 2.6          | 14                                    | 13                              | 3         |
|                   | UV-A         | 7,000                         |                |     |                                  |              | 24                                    | 13                              |           |
|                   | MP UV        | 1,820                         | 1              | 6.5 | 3.5                              | 7            | 4                                     | 4                               |           |
|                   |              |                               |                |     |                                  | 6            | 8                                     |                                 | 6         |
| 10                |              |                               |                |     |                                  | 5            | 4                                     |                                 |           |
| 7.5               |              |                               |                | 2   |                                  | 8            | 7                                     |                                 |           |
|                   |              |                               |                | 6   |                                  | 8            | 10                                    |                                 |           |
|                   |              |                               |                | 10  |                                  | 6            | 8                                     |                                 |           |

**Table S1:** Continued.

| DBPs Quantified | Light Source | Fluence (mJ/cm <sup>2</sup> ) | Duration (min) | pH  | [FAC] (mg/L as Cl <sub>2</sub> ) | [DOC] (mg/L) | [DBP] in Irradiated Experiment (µg/L) | [DBP] in Dark Experiment (µg/L) | Reference |
|-----------------|--------------|-------------------------------|----------------|-----|----------------------------------|--------------|---------------------------------------|---------------------------------|-----------|
| TTHM            | MP UV        | 1,820                         | 1              | 8.5 | 2                                | 3.5          | 10                                    | 9                               | 4         |
|                 |              |                               |                |     | 6                                |              | 10                                    | 11                              |           |
|                 |              |                               |                |     | 10                               |              | 7                                     | 9                               |           |
|                 |              |                               | 1,440          | 6.5 | 6.5                              |              | 100                                   | 50                              |           |
|                 |              |                               |                | 7.5 |                                  |              | 100                                   | 65                              |           |
|                 |              |                               |                | 8.5 |                                  |              | 120                                   | 85                              |           |
|                 | LP UV        | 800                           | 120            | 7.2 | 1.5                              | 3.2          | 15                                    | 31                              | 5         |
|                 |              |                               | 1,440          |     |                                  |              | 17                                    | 40                              |           |
|                 |              |                               | 4,320          |     |                                  |              | 19                                    | 50                              |           |

**Table S2:** Summary of experimental conditions for studies quantifying the formation of haloacetic acids (HAAs) produced by chlorine in the presence and absence of light. The studies quantified the sum of dichloroacetic acid (DCAA) and trichloroacetic acid (TCAA; denoted DCAA + TCAA), the five regulated HAAs (denoted HAA5; the sum of bromoacetic acid, dibromoacetic acid, dichloroacetic acid, monochloroacetic acid, and trichloroacetic acid), or nine HAAs (denoted HAA9; the sum of HAA5, bromochloroacetic acid, bromodichloroacetic acid, chlorodibromoacetic acid, and tribromoacetic acid).

| DBPs Quantified | Light Source | Fluence (mJ/cm <sup>2</sup> ) | Duration (min) | pH  | [FAC] (mg/L as Cl <sub>2</sub> ) | [DOC] (mg/L) | [DBP] in Irradiated Experiment (µg/L) | [DBP] in Dark Experiment (µg/L) | Reference |
|-----------------|--------------|-------------------------------|----------------|-----|----------------------------------|--------------|---------------------------------------|---------------------------------|-----------|
| DCAA + TCAA     | LP UV        | 60                            | 5              | 7   | 7                                | 5            | 57                                    | 76                              | 2         |
|                 |              |                               |                | 7   |                                  | 5            | 118                                   | 108                             |           |
|                 |              |                               |                | 7   |                                  | 5            | 80                                    | 68                              |           |
|                 |              |                               |                | 6.8 |                                  | 1.8          | 48                                    | 37                              |           |
|                 | MP UV        |                               |                | 7   |                                  | 5            | 66                                    | 76                              |           |
|                 |              |                               |                | 7   |                                  | 5            | 98                                    | 108                             |           |
|                 |              |                               |                | 6.8 |                                  | 1.8          | 50                                    | 37                              |           |
|                 |              |                               |                | 7   |                                  | 5            | 95                                    | 68                              |           |
| HAA5            | LP UV        | 3,900                         | 120            | 7.5 | 10                               | 2.6          | 37                                    | 17                              | 3         |
|                 | UV-A         | 7,000                         |                |     |                                  |              | 31                                    | 17                              |           |
|                 | LP UV        | 3,900                         |                |     |                                  |              | 42                                    | 27                              |           |
|                 | UV-A         | 7,000                         |                |     |                                  |              | 47                                    | 27                              |           |
| HAA9            | MP UV        | 1,820                         | 1              | 6.5 | 2                                | 3.5          | 8                                     | 3                               | 4         |
|                 |              |                               |                |     | 6                                |              | 7                                     | 3                               |           |
|                 |              |                               |                |     | 10                               |              | 4                                     | 2                               |           |
|                 |              |                               |                | 7.5 | 2                                |              | 13                                    | 3                               |           |
|                 |              |                               |                |     | 6                                |              | 9                                     | 3                               |           |
|                 |              |                               |                |     | 10                               |              | 5                                     | 3                               |           |

**Table S2:** Continued.

| DBPs Quantified | Light Source | Fluence (mJ/cm <sup>2</sup> ) | Duration (min) | pH    | [FAC] (mg/L as Cl <sub>2</sub> ) | [DOC] (mg/L) | [DBP] in Irradiated Experiment (µg/L) | [DBP] in Dark Experiment (µg/L) | Reference |
|-----------------|--------------|-------------------------------|----------------|-------|----------------------------------|--------------|---------------------------------------|---------------------------------|-----------|
| HAA9            | MP UV        | 1,820                         | 1              | 8.5   | 2                                |              | 15                                    | 3                               | 4         |
|                 |              |                               |                |       | 6                                |              | 8                                     | 3                               |           |
|                 |              |                               |                |       | 10                               |              | 5                                     | 2                               |           |
|                 |              |                               | 1,440          | 6.5   | 6.5                              |              | 140                                   | 70                              |           |
|                 |              |                               |                | 7.5   |                                  |              | 100                                   | 75                              |           |
|                 |              |                               |                | 8.5   |                                  |              | 70                                    | 60                              |           |
|                 |              |                               | HAA5           | LP UV | 800                              |              | 30                                    | 7.2                             |           |
| 120             | 12           | 25                            |                |       |                                  |              |                                       |                                 |           |
| 1,440           | 18           | 34                            |                |       |                                  |              |                                       |                                 |           |
| 4,320           | 22           | 39                            |                |       |                                  |              |                                       |                                 |           |

**Table S3:** Summary of experimental conditions for studies quantifying the formation of haloacetonitriles (HANs) produced by chlorine in the presence and absence of light. Both studies quantified the sum of bromochloroacetonitrile, dibromoacetonitrile, dichloroacetonitrile, and trichloroacetonitrile.

| DBPs Quantified | Light Source | Fluence (mJ/cm <sup>2</sup> ) | Duration (min) | pH  | [FAC] (mg/L as Cl <sub>2</sub> ) | [DOC] (mg/L) | [DBP] in Irradiated Experiment (µg/L) | [DBP] in Dark Experiment (µg/L) | Reference |
|-----------------|--------------|-------------------------------|----------------|-----|----------------------------------|--------------|---------------------------------------|---------------------------------|-----------|
| HAN             | MP UV        | 1,820                         | 1              | 6.5 | 2                                | 3.5          | 2.5                                   | 0                               | 4         |
|                 |              |                               |                |     | 6                                |              | 2.5                                   | 0                               |           |
|                 |              |                               |                |     | 10                               |              | 1.5                                   | 0                               |           |
|                 |              |                               |                | 7.5 | 2                                |              | 4                                     | 0.5                             |           |
|                 |              |                               |                |     | 6                                |              | 3                                     | 0.5                             |           |
|                 |              |                               |                |     | 10                               |              | 1.5                                   | 0                               |           |
|                 |              |                               |                | 8.5 | 2                                |              | 5                                     | 0.5                             |           |
|                 |              |                               |                |     | 6                                |              | 3                                     | 0.5                             |           |
|                 |              |                               |                |     | 10                               |              | 1.5                                   | 0.5                             |           |
|                 |              |                               | 1,440          | 6.5 | 6.5                              |              | 30                                    | 9                               |           |
|                 |              |                               |                | 7.5 |                                  |              | 16                                    | 8                               |           |
|                 |              |                               |                | 8.5 |                                  |              | 4                                     | 3                               |           |
|                 | LP UV        | 800                           | 30             | 7.2 | 1.5                              | 3.2          | 17                                    | 8                               | 5         |
|                 |              |                               | 120            |     |                                  |              | 22                                    | 11                              |           |
|                 |              |                               | 1,440          |     |                                  |              | 26                                    | 14                              |           |
|                 |              |                               | 4,320          |     |                                  |              | 40                                    | 20                              |           |

**Table S4:** Summary of experimental conditions for studies quantifying the formation of total organic halides (TOX) or adsorbable organic halides (AOX).

| DBPs Quantified | Light Source | Fluence (mJ/cm <sup>2</sup> ) | Duration (min) | pH  | [FAC] (mg/L as Cl <sub>2</sub> ) | [DOC] (mg/L) | [DBP] in Irradiated Experiment (µg/L) | [DBP] in Dark Experiment (µg/L) | Reference |
|-----------------|--------------|-------------------------------|----------------|-----|----------------------------------|--------------|---------------------------------------|---------------------------------|-----------|
| TOX             | LP UV        | 60                            | 10             | 6.5 | 0.28                             | 5            | 479.25                                | 443.75                          | 6         |
|                 |              |                               |                | 8.5 |                                  |              | 390.5                                 | 319.5                           |           |
|                 | MP UV        |                               |                | 6.5 |                                  |              | 461.5                                 | 443.75                          |           |
|                 |              |                               |                | 8.5 |                                  |              | 284                                   | 319.5                           |           |
|                 | MP UV        | 220                           | 10             | 6.5 | 0.28                             | 5            | 301.75                                | 337.25                          | 7         |
|                 |              |                               |                |     |                                  | 461.5        | 443.75                                |                                 |           |
|                 | LP UV        | 300                           | 4,320          | 8.6 | 1.7                              | 1            | 111                                   | 113                             | 8         |
|                 | MP UV        |                               |                |     | 2.2                              |              | 147                                   | 113                             |           |
|                 | LP UV        | 3,900                         | 120            | 7.5 | 10                               | 2.6          | 65                                    | 97                              | 3         |
| UV-A            | 7,000        | 97                            |                |     |                                  |              | 97                                    |                                 |           |
| AOX             | MP UV        | 1,820                         | 0.67           | 6.5 | 2                                | 3.5          | 60                                    | 35                              | 4         |
|                 |              |                               |                |     | 6                                |              | 40                                    | 40                              |           |
|                 |              |                               |                |     | 10                               |              | 25                                    | 35                              |           |
|                 |              |                               |                | 7.5 | 2                                |              | 70                                    | 35                              |           |
|                 |              |                               |                |     | 6                                |              | 50                                    | 35                              |           |
|                 |              |                               |                |     | 10                               |              | 30                                    | 35                              |           |
|                 |              |                               |                | 8.5 | 2                                |              | 90                                    | 42                              |           |
|                 |              |                               |                |     | 6                                |              | 70                                    | 35                              |           |
|                 |              |                               |                |     | 10                               |              | 40                                    | 35                              |           |
|                 |              |                               | 1,440          | 6.5 | 6.5                              |              | 300                                   | 200                             |           |
|                 |              |                               |                | 7.5 | 6.5                              |              | 225                                   | 200                             |           |
|                 |              |                               |                | 8.5 | 6.5                              |              | 210                                   | 200                             |           |
|                 |              |                               |                |     |                                  |              |                                       |                                 |           |
|                 |              |                               |                |     |                                  |              |                                       |                                 |           |
|                 |              |                               |                |     |                                  |              |                                       |                                 |           |



## References

1. L. H. Nowell and J. Hoigné, *Water Res.*, 1992, **26**, 599-605.
2. W. Liu, L.-M. Cheung, X. Yang and C. Shang, *Water Res.*, 2006, **40**, 2033-2043.
3. A. N. Pisarenko, B. D. Stanford, S. A. Snyder, S. B. Rivera and A. K. Boal, *J. Adv. Oxid. Technol.*, 2013, **16**, 137-150.
4. D. Wang, J. R. Bolton, S. A. Andrews and R. Hofmann, *Sci. Total Environ.*, 2015, **518-519**, 49-57.
5. X. Zhang, W. Li, I. Blatchley, Ernest R, X. Wang and P. Ren, *Water Res.*, 2015, **68**, 804-811.
6. Q. Zhao, C. Shang and X. Zhang, *Water Sci. Tech.*, 2009, **9**, 627-634.
7. Q. Zhao, C. Shang, X. Zhang, G. Ding and X. Yang, *Water Res.*, 2011, **45**, 6545-6554.
8. M. J. Plewa, E. D. Wagner, D. H. Metz, R. Kashinkunti, K. J. Jamriska and M. Meyer, *Environ. Sci. Technol.*, 2012, **46**, 7811-7817.
